# Supplementary material
Source: PubMed Central journal article supplement (PMC3665108)
Supplement: NIHMS335527-supplement-01.pdf [file NIHMS335527-supplement-01.pdf]

**Online Appendix Table A1. A listing of Individual Data (ordered by baseline A1c)**

| ID | Age (yrs) | Insulin <sup>1</sup> | Gender | CGM Use in mo <sup>6</sup> (Days /wk) | CGMSAT Score | A1c (%)  |        |        |                | CGM Glucose % ≤70mg/dL <sup>2</sup> |        |        |                | CGM Glucose %71-180 mg/dL <sup>2</sup> |        |        |                | CGM Glucose % >250 mg/dL <sup>2</sup> |        |        |                |
|----|-----------|----------------------|--------|---------------------------------------|--------------|----------|--------|--------|----------------|-------------------------------------|--------|--------|----------------|----------------------------------------|--------|--------|----------------|---------------------------------------|--------|--------|----------------|
|    |           |                      |        |                                       |              | Baseline | 13 wks | 26 wks | Change 0 to 26 | Baseline                            | 13 wks | 26 wks | Change 0 to 26 | Baseline                               | 13 wks | 26 wks | Change 0 to 26 | Baseline                              | 13 wks | 26 wks | Change 0 to 26 |
| 1  | 3.9       | I                    | F      | 1.9                                   | 3.9          | 6.8      | 6.3    | 6.9    | +0.1           | 5.5%                                | 3.6%   | 4.2%   | -1.2%          | 41%                                    | 57%    | 59%    | +18%           | 31%                                   | 16%    | 8%     | -23%           |
| 2  | 3.9       | I/P                  | M      | 1.8                                   | 4.8          | 6.9      | 7.2    | 7.1    | +0.2           | 0.0%                                | 0.2%   | 0.5%   | +0.5%          | 56%                                    | 49%    | 53%    | -3%            | 18%                                   | 21%    | 19%    | +1%            |
| 3  | 2.9       | P                    | F      | 7.0                                   | 4.5          | 6.9      | 7.6    | 8.2    | +1.3           | 2.8%                                | 0.7%   | 1.0%   | -1.8%          | 59%                                    | 47%    | 51%    | -8%            | 4%                                    | 19%    | 19%    | +15%           |
| 4  | 3.3       | I                    | M      | 0.0                                   | 3.5          | 7.0      | 7.9    | 8.4    | +1.4           | 0.0%                                | 0.3%   | .      | .              | 51%                                    | 20%    | .      | .              | 26%                                   | 62%    | .      | .              |
| 5  | 2.8       | I/P                  | M      | 1.8                                   | 2.6          | 7.3      | 6.9    | 8.2    | +0.9           | 0.4%                                | 2.6%   | 0.9%   | +0.5%          | 44%                                    | 57%    | 40%    | -4%            | 32%                                   | 9%     | 30%    | -3%            |
| 6  | 3.2       | P                    | F      | 2.8                                   | 4.1          | 7.3      | 7.8    | 8.6    | +1.3           | 2.6%                                | 0.5%   | 0.7%   | -1.8%          | 57%                                    | 57%    | 51%    | -6%            | 8%                                    | 12%    | 14%    | +5%            |
| 7  | 3.2       | P                    | M      | 6.5                                   | 4.7          | 7.3      | 6.8    | 7.4    | +0.1           | 11.1%                               | 2.8%   | 1.8%   | -9.3%          | 63%                                    | 66%    | 46%    | -17%           | 8%                                    | 10%    | 26%    | +19%           |
| 8  | 3.6       | I/P                  | M      | 3.0                                   | 3.8          | 7.7      | 7.9    | 7.2    | -0.5           | 3.0%                                | 0.3%   | 0.1%   | -2.8%          | 52%                                    | 58%    | 67%    | +15%           | 23%                                   | 12%    | 8%     | -16%           |
| 9  | 2.3       | P                    | F      | 7.0                                   | 4.3          | 7.9      | 7.7    | 7.4    | -0.5           | 8.4%                                | 2.9%   | 2.1%   | -6.2%          | 27%                                    | 41%    | 44%    | +17%           | 38%                                   | 33%    | 26%    | -12%           |
| 10 | 2.4       | I                    | M      | 6.7                                   | 4.3          | 7.9      | 9.1    | 8.6    | +0.7           | 1.5%                                | 0.3%   | 0.5%   | -1.0%          | 26%                                    | 36%    | 43%    | +17%           | 37%                                   | 30%    | 17%    | -20%           |
| 11 | 2.4       | P                    | M      | 7.0                                   | 4.8          | 7.9      | 7.2    | 7.8    | -0.1           | 3.6%                                | 0.7%   | 4.9%   | +1.3%          | 72%                                    | 63%    | 66%    | -6%            | 11%                                   | 10%    | 9%     | -2%            |
| 12 | 3.7       | P                    | M      | 3.8                                   | 3.4          | 7.9      | 8.3    | 8.4    | +0.5           | 1.8%                                | 1.2%   | 0.9%   | -0.9%          | 30%                                    | 43%    | 38%    | +7%            | 42%                                   | 28%    | 25%    | -17%           |
| 13 | 3.0       | P                    | F      | 4.5                                   | 4.5          | 8.0      | 7.1    | 6.9    | -1.1           | 8.4%                                | 1.2%   | 1.4%   | -7.0%          | 77%                                    | 70%    | 67%    | -10%           | 3%                                    | 4%     | 4%     | +1%            |
| 14 | 3.3       | P                    | M      | 6.7                                   | 4.3          | 8.1      | 8.6    | 8.0    | -0.1           | 0.0%                                | 0.2%   | 0.3%   | +0.3%          | 53%                                    | 34%    | 46%    | -7%            | 15%                                   | 27%    | 24%    | +8%            |
| 15 | 2.8       | I                    | F      | 7.0                                   | 4.3          | 8.1      | 6.8    | 6.7    | -1.4           | 0.2%                                | 7.1%   | 10.1%  | +9.9%          | 37%                                    | 60%    | 65%    | +28%           | 20%                                   | 10%    | 8%     | -12%           |
| 16 | 3.6       | I                    | M      | 0.0                                   | 3.8          | 8.7      | 8.5    | 8.4    | -0.3           | 1.3%                                | 0.3%   | .      | .              | 28%                                    | 37%    | .      | .              | 44%                                   | 27%    | .      | .              |
| 17 | 3.9       | I                    | M      | 6.7                                   | 4.0          | 8.8      | 9.4    | 8.9    | +0.1           | 0.0%                                | .      | 0.1%   | +0.1%          | 33%                                    | .      | 28%    | -5%            | 21%                                   | .      | 37%    | +16%           |
| 18 | 3.5       | I                    | M      | 1.7                                   | 4.0          | 8.9      | 8.8    | 9.1    | +0.2           | 1.6%                                | 0.4%   | 0.4%   | -1.2%          | 16%                                    | 13%    | 18%    | +2%            | 73%                                   | 64%    | 52%    | -20%           |
| 19 | 2.9       | I                    | F      | 4.8                                   | 4.2          | 9.2      | 9.7    | 9.4    | +0.2           | 0.0%                                | 0.7%   | 0.2%   | +0.2%          | 10%                                    | 7%     | 14%    | +5%            | 70%                                   | 69%    | 58%    | -12%           |
| 20 | 1.5       | I/P                  | M      | 6.3                                   | 4.4          | 9.4      | 8.6    | 8.3    | -1.1           | 0.2%                                | 0.6%   | 0.4%   | +0.2%          | 26%                                    | 34%    | 43%    | +17%           | 46%                                   | 22%    | 20%    | -25%           |

1 - 'I' denotes Injection; "P" denotes Pump; "I/P" denotes Switched from Injection to Pump during study.

2 - glucose indices were not calculated if the amount of CGM data was less than 24 hours in the 4 weeks prior to visit.
